# Supplementary material for: Social Network Analysis of Farmers after the Private Cooperatives’ “Intervention” in a Rural Area of China—A Case Study of the XiangX Cooperative in Shandong Province
Source: MDPI journal article supplement (doi:10.3390/agriculture14050649), 2024-04-23
Supplement: s1 [file s1]

Due to space constraints, we explain the characteristics of the central farmers here.

In the adjoining-land relationship (Figure. 5b), H45 had the highest centralities of degree, closeness, and betweenness, which may be because this smallholder's plot was located in the geometric center of the cooperative's plot network (Fig. 4). Moreover, when the cooperative was established, it incorporated smallholders whose plots were adjacent to each other. As a result, network centralities for the adjoining land relationship were higher than for the other relationships. For example, the mean values of its centralities of degree, closeness, and betweenness are 1.79, 1.61, and 4.99, respectively.

In the labor-sharing relationship (Figure. 5c), Z28 showed the highest centralities of degree and closeness, 3.54 and 0.95, respectively, and its betweenness centrality ranked second among all smallholders. The reason for this was that Z28 was much older than other smallholders who adopted the farmland trusteeship service, and he received more help from neighbors or their relatives during the production process.

For the machinery-sharing relationship (Figure. 5d), H16, H32, and H2 ranked as the top three centralities. Among them, H16 owned a combine harvester machine, and he was responsible for helping villagers harvesting wheat and corn in the village. H32 owned a seeding machine, and he was responsible for helping villagers sowing food crops in the village. H2 owned a rotary plow, which was responsible for loosening and turning the soil. The difference in the number of machines owned within the village, and the personal relationships in the rural community, resulted in different sizes of centrality for the three members. Numerically, H16 had the highest centrality due to the high levels of labor required during harvesting.

In the kinship network (Figure. 5e), H60 showed the highest centralities of degree, closeness, and betweenness, 3.54, 0.97, and 0.54, respectively. This was because H60 was the eldest of the smallholders who adopted farmland trusteeship service, and more relatives in the younger generations of H60's family adopted farmland trusteeship service, thereby forming the most kinship connections with him.

The centralities of degree and betweenness in the synthetic social network (Figure. 5f) were larger, with H16 attaining 46.02 and 10.67, respectively, and with H16, H32, H2, and Z10 occupying the top four places of centrality. Collectively, it seems that these four smallholders had a greater influence and status within the cooperative. They played an important role both in the degree of connection with other smallholders and as the most convenient medium for smallholders to connect with each other.

To observe the differences in each village within the cooperative, this paper separately calculated network centrality for the smallholders who adopted farmland trusteeship service in both Zhusihuang and Hegouzhao. The centrality of each smallholder was ranked from largest to smallest. Tables S1 and S2 show the top five rankings of smallholders in the villages of Zhusihuang and Hegouzhao, respectively.

In Zhusihuang, Z7 showed the highest centralities of degree, closeness, and betweenness in the neighborhood network. Similarly, Z22 in the adjoining land relationship, Z8 in the kinship network, Z9 in the labor-sharing relationship network, and Z10 in the mechanical-sharing relationship all showed the highest centralities. These smallholders were in central positions within their networks, meaning that not only were they connected to the most smallholders in different networks, but they were also located on the shortest path of communication among the smallholders who adopted farmland trusteeship service, and they were spatially closer to

the geometric center of the network. In the synthetic social network (Figure 4), all of Z10's three centrality degrees were much larger than those in second place, similar to the machinery network.

**Table S1.** The top five smallholders of the three centralities of Zhusi Huang in six relationships

|                               | Smallholders | NR    | Smallholders | ALR   | Smallholders | LSR  | Smallholders | MSR   | Smallholders | KR    | Smallholders | SR    |
|-------------------------------|--------------|-------|--------------|-------|--------------|------|--------------|-------|--------------|-------|--------------|-------|
| <b>Degree centrality</b>      | Z7           | 19.05 | Z22          | 4.76  | Z28          | 9.52 | Z10          | 90.48 | Z8           | 7.14  | Z10          | 90.48 |
|                               | Z23          | 14.29 | Z23          | 4.76  | Z9           | 7.14 | Z15          | 38.10 | Z33          | 7.14  | Z34          | 42.86 |
|                               | Z13          | 14.29 | Z21          | 4.76  | Z8           | 7.14 | Z34          | 35.71 | Z38          | 4.76  | Z15          | 40.48 |
|                               | Z16          | 14.29 | Z20          | 4.76  | Z37          | 7.14 | Z12          | 33.33 | Z11          | 4.76  | Z12          | 35.71 |
|                               | Z38          | 11.91 | Z24          | 4.76  | Z31          | 7.14 | Z23          | 7.14  | Z27          | 4.76  | Z23          | 26.19 |
| <b>Closeness centrality</b>   | Z7           | 17.43 | Z22          | 9.09  | Z9           | 2.92 | Z10          | 20    | Z33          | 2.563 | Z10          | 91.30 |
|                               | Z12          | 16.87 | Z23          | 9.07  | Z37          | 2.92 | Z15          | 18.10 | Z9           | 2.561 | Z34          | 63.64 |
|                               | Z6           | 16.60 | Z21          | 9.07  | Z28          | 2.92 | Z34          | 18.03 | Z31          | 2.559 | Z15          | 62.69 |
|                               | Z13          | 16.54 | Z20          | 9.01  | Z34          | 2.91 | Z12          | 17.95 | Z32          | 2.559 | Z12          | 60    |
|                               | Z20          | 16.41 | Z24          | 9.01  | Z31          | 2.91 | Z23          | 17.14 | Z13          | 2.559 | Z23          | 57.53 |
| <b>Betweenness centrality</b> | Z7           | 27.58 | Z22          | 51.22 | Z9           | 2.32 | Z10          | 61.10 | Z33          | 0.470 | Z10          | 41.83 |
|                               | Z38          | 17.67 | Z23          | 51.10 | Z37          | 2.09 | Z15          | 5.96  | Z9           | 0.35  | Z34          | 8.68  |
|                               | Z12          | 16.76 | Z21          | 51.10 | Z28          | 2.09 | Z34          | 5.05  | Z8           | 0.23  | Z15          | 5.96  |
|                               | Z11          | 15.73 | Z20          | 50.76 | Z31          | 1.63 | Z12          | 4.39  | Z5           | 0.23  | Z12          | 3.66  |
|                               | Z17          | 15.10 | Z24          | 50.76 | Z23          | 0.23 | Z23          | 0.02  | Z4           | 0.23  | Z31          | 2.28  |

Note: NR, ALR, LSR, MSR, KR, SR indicate neighbor relationship, adjoining-land relationship, labor-sharing relationship, mechanical-sharing relationship, kinship, synthetic relationship, respectively.

In Hegouzhaohao, the highest degree of centrality appeared in H13. The high values of betweenness and closeness centralities for H11. In the adjoining land relationship, H46's three centralities were prominent in Hegouzhaohao. In the labor-sharing relationship, H12 showed the highest centralities. In the kinship network, the highest value of centrality was H60. In the mechanical-sharing relationship, as machinery owners in this village, H16, H32, H2, and H36 were at the core of the machinery-sharing network, and their mediating role in this network was obvious. In the synthetic social network, the four smallholders who owned the machinery still had higher centrality; this was similar to Zhusi Huang in that the connection among the smallholders was mainly reflected in machinery sharing.

By calculating the centrality of each smallholder of the two villages and the cooperative, it was found that the centrality of the smallholders within single village was larger than that of the cooperative. This proves that the social network intensity of smallholders within single village is stronger than the cross-village cooperative. The network of smallholders did not break the village boundaries, and hypothesis 3 is disproven.

**Table S2** The top five smallholders of the three centralities of Hegouzhaohao in six relationships

|                          | Smallholders | NR   | Smallholders | ALR  | Smallholders | LSR  | Smallholders | MSR   | Smallholders | KR   | Smallholders | SR    |
|--------------------------|--------------|------|--------------|------|--------------|------|--------------|-------|--------------|------|--------------|-------|
| <b>Degree centrality</b> | H13          | 10   | H46          | 5.71 | H12          | 5.71 | H16          | 72.86 | H60          | 5.71 | H16          | 74.29 |
|                          | H12          | 8.57 | Z43          | 5.71 | H40          | 4.29 | H32          | 65.71 | H36          | 5.71 | H32          | 71.43 |
|                          | H16          | 8.57 | H54          | 4.29 | H33          | 2.86 | H2           | 57.14 | H13          | 5.71 | H2           | 60    |
|                          | H18          | 8.57 | H56          | 4.29 | H41          | 2.86 | H36          | 32.86 | H16          | 5.71 | H36          | 40    |
|                          | H10          | 7.14 | H5           | 2.86 | H9           | 2.86 | H8           | 5.71  | H26          | 4.29 | H13          | 18.57 |

|                               |     |       |     |       |     |      |     |       |     |      |     |       |
|-------------------------------|-----|-------|-----|-------|-----|------|-----|-------|-----|------|-----|-------|
| <b>Closeness centrality</b>   | H33 | 3.54  | H46 | 8.69  | H12 | 1.54 | H16 | 9.86  | H60 | 1.66 | H16 | 79.55 |
|                               | H36 | 3.54  | H56 | 8.51  | H9  | 1.54 | H32 | 9.79  | H36 | 1.66 | H32 | 77.78 |
|                               | H11 | 3.54  | H5  | 8.35  | H21 | 1.54 | H2  | 9.70  | H33 | 1.66 | H2  | 71.43 |
|                               | H16 | 3.53  | H41 | 8.33  | H18 | 1.54 | H36 | 9.47  | H41 | 1.66 | H36 | 60.87 |
|                               | H38 | 3.53  | H7  | 8.32  | H16 | 1.54 | H8  | 9.25  | H50 | 1.66 | H13 | 53.85 |
| <b>Betweenness centrality</b> | H16 | 12.74 | H46 | 51.80 | H12 | 0.54 | H16 | 30.63 | H60 | 1.41 | H16 | 27.96 |
|                               | H11 | 12.45 | H7  | 31.68 | H40 | 0.29 | H32 | 22.76 | H36 | 1.28 | H32 | 23.99 |
|                               | H44 | 12.09 | Z43 | 30.81 | H33 | 0.25 | H2  | 15.97 | H13 | 1.20 | H2  | 17.53 |
|                               | H38 | 10.79 | H16 | 30.15 | H41 | 0.25 | H36 | 6.86  | H41 | 0.99 | H36 | 7.18  |
|                               | H33 | 9.49  | H63 | 28.53 | H36 | 0.25 | H8  | 0.03  | H2  | 0.99 | H47 | 2.70  |

Note: NR, ALR, LSR, MSR, KR, SR indicate neighbor relationship, adjoining-land relationship, labor-sharing relationship, mechanical-sharing relationship, kinship, synthetic relationship, respectively.

**Table S3** Smallholders’ centralities in the cooperative (neighbor, adjoining-land relationship, labor-sharing relationship)

| Smallholders | Neighbor relationship |                      |                        | Adjoining land relationship |                      |                        | Labor-sharing relationship |                      |                        |
|--------------|-----------------------|----------------------|------------------------|-----------------------------|----------------------|------------------------|----------------------------|----------------------|------------------------|
|              | Degree centrality     | Closeness centrality | Betweenness centrality | Degree centrality           | Closeness centrality | Betweenness centrality | Degree centrality          | Closeness centrality | Betweenness centrality |
| H1           | 1.77                  | 1.408                | 0                      | 1.77                        | 1.864                | 6.637                  | 0.885                      | 0.885                | 0                      |
| H2           | 3.54                  | 1.412                | 3.195                  | 1.77                        | 1.836                | 2.078                  | 0.885                      | 0.885                | 0                      |
| H3           | 2.655                 | 1.412                | 2.863                  | 1.77                        | 1.839                | 2.26                   | 0                          | 0                    | 0                      |
| H4           | 2.655                 | 1.413                | 2.961                  | 1.77                        | 1.846                | 8.85                   | 0.885                      | 0.885                | 0                      |
| H5           | 0.885                 | 1.404                | 0                      | 1.77                        | 1.853                | 2.987                  | 0                          | 0                    | 0                      |
| H6           | 2.655                 | 1.414                | 0.839                  | 1.77                        | 1.911                | 10.446                 | 0                          | 0                    | 0                      |
| H7           | 3.54                  | 1.415                | 2.105                  | 1.77                        | 1.873                | 10.24                  | 0.885                      | 0.885                | 0                      |
| H8           | 1.77                  | 1.416                | 0                      | 1.77                        | 1.91                 | 12.089                 | 0.885                      | 0.925                | 0                      |
| H9           | 4.425                 | 1.417                | 2.087                  | 0.885                       | 1.692                | 0                      | 1.77                       | 0.926                | 0.079                  |
| H10          | 4.425                 | 1.417                | 1.347                  | 1.77                        | 1.833                | 1.952                  | 0                          | 0                    | 0                      |
| H11          | 4.425                 | 1.42                 | 4.751                  | 1.77                        | 1.847                | 5.752                  | 0                          | 0                    | 0                      |
| H12          | 5.31                  | 1.419                | 3.276                  | 1.77                        | 1.837                | 5.215                  | 3.54                       | 0.926                | 0.205                  |
| H13          | 6.195                 | 1.415                | 0.91                   | 1.77                        | 1.863                | 3.524                  | 0                          | 0                    | 0                      |
| H14          | 3.54                  | 1.411                | 0.132                  | 1.77                        | 1.875                | 7.174                  | 0                          | 0                    | 0                      |
| H15          | 2.655                 | 1.416                | 0.177                  | 1.77                        | 1.853                | 2.987                  | 0.885                      | 0.893                | 0                      |
| H16          | 5.31                  | 1.419                | 4.861                  | 1.77                        | 1.899                | 11.504                 | 0.885                      | 0.925                | 0                      |
| H17          | 4.425                 | 1.416                | 0.73                   | 1.77                        | 1.827                | 4.678                  | 0.885                      | 0.925                | 0                      |
| H18          | 5.31                  | 1.413                | 0.695                  | 1.77                        | 1.854                | 6.1                    | 0.885                      | 0.925                | 0                      |
| H19          | 2.655                 | 1.408                | 0                      | 1.77                        | 1.843                | 5.563                  | 0                          | 0                    | 0                      |
| H20          | 1.77                  | 1.412                | 0                      | 1.77                        | 1.868                | 6.827                  | 1.77                       | 0.893                | 0.016                  |
| H21          | 3.54                  | 1.413                | 0.93                   | 1.77                        | 1.813                | 3.951                  | 1.77                       | 0.926                | 0.079                  |
| H22          | 0.885                 | 1.405                | 0                      | 1.77                        | 1.79                 | 2.663                  | 0                          | 0                    | 0                      |
| H23          | 0.885                 | 0.885                | 0                      | 1.77                        | 1.708                | 1.027                  | 0.885                      | 0.885                | 0                      |
| H24          | 0.885                 | 0.885                | 0                      | 1.77                        | 1.881                | 4.441                  | 0.885                      | 0.885                | 0                      |
| H25          | 0                     | 0                    | 0                      | 1.77                        | 1.833                | 5.025                  | 0.885                      | 0.893                | 0                      |
| H26          | 0.885                 | 0.885                | 0                      | 1.77                        | 1.741                | 2.987                  | 0                          | 0                    | 0                      |
| H27          | 0.885                 | 0.885                | 0                      | 1.77                        | 1.792                | 2.789                  | 0                          | 0                    | 0                      |
| H28          | 0                     | 0                    | 0                      | 1.77                        | 1.725                | 2.023                  | 0                          | 0                    | 0                      |
| H29          | 0                     | 0                    | 0                      | 1.77                        | 1.832                | 8.107                  | 0                          | 0                    | 0                      |
| H30          | 0.885                 | 1.41                 | 0                      | 1.77                        | 1.803                | 3.413                  | 0.885                      | 0.917                | 0                      |

|     |       |       |       |       |       |        |       |       |       |
|-----|-------|-------|-------|-------|-------|--------|-------|-------|-------|
| H31 | 0     | 0     | 0     | 1.77  | 0.901 | 0.008  | 0     | 0     | 0     |
| H32 | 3.54  | 1.418 | 1.38  | 1.77  | 1.757 | 3.919  | 1.77  | 0.917 | 0.063 |
| H33 | 4.425 | 1.42  | 3.622 | 1.77  | 0.901 | 0.008  | 1.77  | 0.917 | 0.095 |
| H34 | 3.54  | 1.418 | 1.649 | 1.77  | 1.794 | 2.876  | 0     | 0     | 0     |
| H35 | 1.77  | 1.411 | 2.592 | 1.77  | 1.773 | 4.82   | 0.885 | 0.917 | 0     |
| H36 | 3.54  | 1.42  | 3.073 | 1.77  | 1.795 | 2.947  | 1.77  | 0.917 | 0.095 |
| H37 | 3.54  | 1.418 | 3.419 | 1.77  | 0.901 | 0.008  | 1.77  | 0.917 | 0.063 |
| H38 | 3.54  | 1.419 | 4.118 | 1.77  | 1.9   | 8.439  | 0.885 | 0.917 | 0     |
| H39 | 0.885 | 1.409 | 0     | 1.77  | 1.823 | 4.488  | 0.885 | 0.917 | 0     |
| H40 | 3.54  | 1.417 | 2.216 | 1.77  | 1.867 | 3.714  | 2.655 | 0.917 | 0.111 |
| H41 | 2.655 | 1.417 | 1.521 | 1.77  | 1.911 | 8.976  | 1.77  | 0.917 | 0.095 |
| H42 | 2.655 | 1.415 | 3.286 | 1.77  | 1.803 | 3.382  | 1.77  | 0.917 | 0.063 |
| H43 | 1.77  | 1.413 | 3.144 | 1.77  | 1.885 | 1.185  | 0.885 | 0.917 | 0     |
| H44 | 2.655 | 1.413 | 4.614 | 1.77  | 0.901 | 0.008  | 1.77  | 0.893 | 0     |
| H45 | 1.77  | 1.406 | 2.592 | 3.54  | 1.922 | 19.769 | 1.77  | 0.893 | 0     |
| H46 | 1.77  | 1.412 | 2.851 | 1.77  | 1.798 | 3.137  | 1.77  | 0.893 | 0     |
| H47 | 1.77  | 1.4   | 1.991 | 1.77  | 1.878 | 4.251  | 0     | 0     | 0     |
| H48 | 1.77  | 1.393 | 1.359 | 1.77  | 1.873 | 0.601  | 0     | 0     | 0     |
| H49 | 1.77  | 1.386 | 0.695 | 1.77  | 1.907 | 5.705  | 0     | 0     | 0     |
| H50 | 0.885 | 1.378 | 0     | 1.77  | 1.808 | 3.698  | 0     | 0     | 0     |
| H51 | 0.885 | 0.909 | 0     | 1.77  | 1.803 | 6.527  | 0     | 0     | 0     |
| H52 | 2.655 | 0.909 | 0.047 | 2.655 | 1.904 | 10.461 | 0.885 | 0.885 | 0     |
| H53 | 2.655 | 0.909 | 0.047 | 1.77  | 1.907 | 10.24  | 0.885 | 0.885 | 0     |
| H54 | 0.885 | 0.909 | 0     | 1.77  | 1.916 | 10.683 | 0     | 0     | 0     |
| H55 | 1.77  | 0.909 | 0     | 1.77  | 1.839 | 2.236  | 0     | 0     | 0     |
| H56 | 0     | 0     | 0     | 1.77  | 1.869 | 0.411  | 0     | 0     | 0     |
| H57 | 0.885 | 0.885 | 0     | 1.77  | 1.817 | 4.14   | 0.885 | 0.885 | 0     |
| H58 | 0.885 | 0.885 | 0     | 1.77  | 1.892 | 4.978  | 0.885 | 0.885 | 0     |
| H59 | 1.77  | 1.397 | 0     | 1.77  | 1.889 | 7.901  | 0     | 0     | 0     |
| H60 | 2.655 | 1.397 | 0.008 | 1.77  | 1.842 | 2.426  | 0.885 | 0.893 | 0     |
| H61 | 3.54  | 1.405 | 1.999 | 1.77  | 1.886 | 10.888 | 1.77  | 0.893 | 0.016 |
| H62 | 1.77  | 1.397 | 0     | 1.77  | 1.885 | 7.712  | 0.885 | 0.893 | 0     |
| H63 | 0.885 | 0.885 | 0     | 1.77  | 1.788 | 5.689  | 0.885 | 0.885 | 0     |
| H64 | 0.885 | 0.885 | 0     | 1.77  | 1.899 | 8.502  | 0.885 | 0.885 | 0     |
| H65 | 0     | 0     | 0     | 1.77  | 1.86  | 9.561  | 0     | 0     | 0     |
| H66 | 0.885 | 0.909 | 0     | 1.77  | 1.878 | 7.364  | 0     | 0     | 0     |
| H67 | 0.885 | 0.909 | 0     | 1.77  | 1.857 | 6.29   | 0     | 0     | 0     |
| H68 | 2.655 | 0.909 | 0.079 | 1.77  | 1.877 | 0.806  | 0.885 | 0.885 | 0     |
| H69 | 1.77  | 0.909 | 0.047 | 1.77  | 1.847 | 2.671  | 0.885 | 0.885 | 0     |
| H70 | 0.885 | 0.909 | 0     | 3.54  | 1.896 | 11.757 | 0     | 0     | 0     |
| H71 | 0     | 0     | 0     | 1.77  | 1.818 | 7.332  | 0     | 0     | 0     |
| Z1  | 3.54  | 1.315 | 0.209 | 0.885 | 1.256 | 0      | 0     | 0     | 0     |
| Z2  | 1.77  | 1.313 | 0     | 1.77  | 1.262 | 0.648  | 2.655 | 0.951 | 0     |
| Z3  | 1.77  | 1.309 | 0     | 1.77  | 1.267 | 1.264  | 0.885 | 0.893 | 0     |
| Z4  | 2.655 | 1.319 | 1.747 | 1.77  | 1.273 | 1.849  | 0     | 0     | 0     |
| Z5  | 2.655 | 1.31  | 0.563 | 1.77  | 1.278 | 2.402  | 0.885 | 0.885 | 0     |
| Z6  | 2.655 | 1.32  | 1.832 | 1.77  | 1.282 | 2.924  | 0.885 | 0.885 | 0     |
| Z7  | 7.08  | 1.322 | 3.752 | 1.77  | 1.287 | 3.413  | 1.77  | 0.893 | 0     |
| Z8  | 4.425 | 1.319 | 1.469 | 1.77  | 1.291 | 3.872  | 2.655 | 0.951 | 0     |
| Z9  | 3.54  | 1.319 | 0.57  | 1.77  | 1.295 | 4.298  | 2.655 | 0.952 | 0.316 |
| Z10 | 2.655 | 1.315 | 2     | 1.77  | 1.299 | 4.693  | 0     | 0     | 0     |

|     |       |       |       |       |       |       |       |       |       |
|-----|-------|-------|-------|-------|-------|-------|-------|-------|-------|
| Z11 | 4.425 | 1.319 | 2.14  | 1.77  | 1.302 | 5.057 | 1.77  | 0.901 | 0.032 |
| Z12 | 3.54  | 1.321 | 2.281 | 1.77  | 1.305 | 5.389 | 1.77  | 0.893 | 0     |
| Z13 | 5.31  | 1.32  | 1.303 | 1.77  | 1.308 | 5.689 | 1.77  | 0.951 | 0     |
| Z14 | 4.425 | 1.316 | 0.206 | 1.77  | 1.311 | 5.958 | 0.885 | 0.901 | 0     |
| Z15 | 1.77  | 1.316 | 0.702 | 1.77  | 1.313 | 6.195 | 0.885 | 0.885 | 0     |
| Z16 | 5.31  | 1.318 | 1.357 | 1.77  | 1.315 | 6.4   | 1.77  | 0.951 | 0     |
| Z17 | 2.655 | 1.317 | 2.054 | 1.77  | 1.317 | 6.574 | 0.885 | 0.885 | 0     |
| Z18 | 2.655 | 1.313 | 1.311 | 1.77  | 1.318 | 6.716 | 1.77  | 0.893 | 0.016 |
| Z19 | 1.77  | 1.311 | 0     | 1.77  | 1.319 | 6.827 | 0.885 | 0.885 | 0     |
| Z20 | 2.655 | 1.32  | 1.399 | 1.77  | 1.32  | 6.906 | 1.77  | 0.893 | 0     |
| Z21 | 1.77  | 1.31  | 0.601 | 1.77  | 1.321 | 6.953 | 0.885 | 0.885 | 0     |
| Z22 | 0     | 0     | 0     | 1.77  | 1.321 | 6.969 | 0     | 0     | 0     |
| Z23 | 5.31  | 1.316 | 0.355 | 1.77  | 1.321 | 6.953 | 1.77  | 0.901 | 0.032 |
| Z24 | 0     | 0     | 0     | 1.77  | 1.32  | 6.906 | 0.885 | 0.893 | 0     |
| Z25 | 1.77  | 1.307 | 0     | 1.77  | 1.319 | 6.827 | 0.885 | 0.885 | 0     |
| Z26 | 2.655 | 1.318 | 1.932 | 1.77  | 1.318 | 6.716 | 0.885 | 0.885 | 0     |
| Z27 | 1.77  | 1.313 | 0     | 1.77  | 1.317 | 6.574 | 2.655 | 0.951 | 0     |
| Z28 | 2.655 | 1.317 | 0.967 | 1.77  | 1.315 | 6.4   | 3.54  | 0.952 | 0.284 |
| Z29 | 1.77  | 1.317 | 1.12  | 1.77  | 1.313 | 6.195 | 0     | 0     | 0     |
| Z30 | 2.655 | 1.315 | 1.311 | 1.77  | 1.311 | 5.958 | 0.885 | 0.901 | 0     |
| Z31 | 4.425 | 1.317 | 0.361 | 1.77  | 1.308 | 5.689 | 2.655 | 0.951 | 0.221 |
| Z32 | 1.77  | 1.313 | 0     | 1.77  | 1.305 | 5.389 | 0     | 0     | 0     |
| Z33 | 0.885 | 1.309 | 0     | 1.77  | 1.302 | 5.057 | 0     | 0     | 0     |
| Z34 | 3.54  | 1.319 | 0.197 | 1.77  | 1.299 | 4.693 | 1.77  | 0.951 | 0     |
| Z35 | 0     | 0     | 0     | 1.77  | 1.295 | 4.298 | 0     | 0     | 0     |
| Z36 | 2.655 | 1.309 | 0.486 | 1.77  | 1.291 | 3.872 | 0.885 | 0.885 | 0     |
| Z37 | 3.54  | 1.318 | 0.25  | 1.77  | 1.287 | 3.413 | 2.655 | 0.952 | 0.284 |
| Z38 | 4.425 | 1.316 | 2.405 | 1.77  | 1.282 | 2.924 | 0     | 0     | 0     |
| Z39 | 3.54  | 1.315 | 1.858 | 1.77  | 1.278 | 2.402 | 0     | 0     | 0     |
| Z40 | 0.885 | 1.309 | 0     | 1.77  | 1.273 | 1.849 | 0     | 0     | 0     |
| Z41 | 2.655 | 1.311 | 0.938 | 1.77  | 1.267 | 1.264 | 0.885 | 0.885 | 0     |
| Z42 | 0.885 | 1.304 | 0     | 1.77  | 1.262 | 0.648 | 0.885 | 0.885 | 0     |
| Z43 | 1.77  | 1.311 | 0     | 0.885 | 1.256 | 0     | 0.885 | 0.885 | 0     |

**Table S4** Smallholders' centralities in the cooperative (kinship, mechanical-sharing relationship, synthetic relationship).

| Smallholders | Kinship           |                      |                        | Mechanical-sharing relationship |                      |                        | Synthetic relationship |                      |                        |
|--------------|-------------------|----------------------|------------------------|---------------------------------|----------------------|------------------------|------------------------|----------------------|------------------------|
|              | Degree centrality | Closeness centrality | Betweenness centrality | Degree centrality               | Closeness centrality | Betweenness centrality | Degree centrality      | Closeness centrality | Betweenness centrality |
| H1           | 0                 | 0                    | 0                      | 1.77                            | 1.867                | 0                      | 4.425                  | 2.239                | 0.011                  |
| H2           | 1.77              | 0.961                | 0.379                  | 35.398                          | 1.88                 | 6.096                  | 37.168                 | 2.26                 | 6.691                  |
| H3           | 0                 | 0                    | 0                      | 2.655                           | 1.868                | 0                      | 6.195                  | 2.241                | 0.052                  |
| H4           | 0.885             | 0.885                | 0                      | 1.77                            | 1.867                | 0                      | 6.195                  | 2.24                 | 0.077                  |
| H5           | 1.77              | 0.96                 | 0.332                  | 0                               | 0                    | 0                      | 3.54                   | 2.234                | 0.158                  |
| H6           | 0.885             | 0.967                | 0                      | 2.655                           | 1.868                | 0                      | 7.08                   | 2.242                | 0.07                   |
| H7           | 0.885             | 0.901                | 0                      | 1.77                            | 1.866                | 0                      | 7.965                  | 2.24                 | 0.163                  |
| H8           | 1.77              | 0.969                | 0.284                  | 3.54                            | 1.869                | 0.006                  | 8.85                   | 2.244                | 0.114                  |
| H9           | 1.77              | 0.893                | 0.016                  | 2.655                           | 1.868                | 0                      | 9.735                  | 2.243                | 0.14                   |
| H10          | 1.77              | 0.96                 | 0                      | 0                               | 0                    | 0                      | 7.965                  | 2.241                | 0.095                  |
| H11          | 0                 | 0                    | 0                      | 1.77                            | 1.867                | 0                      | 7.08                   | 2.243                | 0.5                    |
| H12          | 0.885             | 0.893                | 0                      | 2.655                           | 1.868                | 0                      | 8.85                   | 2.243                | 0.086                  |

|     |       |       |       |        |       |        |        |       |        |
|-----|-------|-------|-------|--------|-------|--------|--------|-------|--------|
| H13 | 3.54  | 0.961 | 0.458 | 1.77   | 1.867 | 0      | 11.504 | 2.246 | 0.425  |
| H14 | 0     | 0     | 0     | 2.655  | 1.868 | 0      | 7.965  | 2.242 | 0.123  |
| H15 | 0.885 | 0.893 | 0     | 2.655  | 1.868 | 0      | 6.195  | 2.242 | 0.03   |
| H16 | 3.54  | 0.96  | 0.253 | 45.133 | 1.884 | 11.689 | 46.018 | 2.265 | 10.671 |
| H17 | 1.77  | 0.901 | 0     | 2.655  | 1.868 | 0      | 8.85   | 2.243 | 0.145  |
| H18 | 0     | 0     | 0     | 2.655  | 1.868 | 0      | 8.85   | 2.243 | 0.101  |
| H19 | 0     | 0     | 0     | 1.77   | 1.867 | 0      | 5.31   | 2.24  | 0.028  |
| H20 | 1.77  | 0.893 | 0.016 | 2.655  | 1.868 | 0      | 6.195  | 2.242 | 0.438  |
| H21 | 0.885 | 0.885 | 0     | 1.77   | 1.868 | 0      | 7.965  | 2.241 | 0.086  |
| H22 | 1.77  | 0.901 | 0     | 1.77   | 1.866 | 0      | 6.195  | 2.239 | 0.049  |
| H23 | 0.885 | 0.885 | 0     | 2.655  | 1.868 | 0      | 6.195  | 2.241 | 0.053  |
| H24 | 0.885 | 0.893 | 0     | 2.655  | 1.869 | 0.006  | 6.195  | 2.242 | 0.041  |
| H25 | 0.885 | 0.893 | 0     | 2.655  | 1.868 | 0      | 5.31   | 2.241 | 0.039  |
| H26 | 2.655 | 0.901 | 0.032 | 2.655  | 1.869 | 0.006  | 7.965  | 2.243 | 0.123  |
| H27 | 1.77  | 0.96  | 0     | 1.77   | 1.867 | 0      | 5.31   | 2.241 | 0.05   |
| H28 | 0     | 0     | 0     | 1.77   | 1.867 | 0      | 3.54   | 2.238 | 0.004  |
| H29 | 0.885 | 0.885 | 0     | 1.77   | 1.868 | 0      | 3.54   | 2.24  | 0.243  |
| H30 | 0.885 | 0.893 | 0     | 3.54   | 1.869 | 0.006  | 6.195  | 2.242 | 0.051  |
| H31 | 0     | 0     | 0     | 0      | 0     | 0      | 1.77   | 2.217 | 0.003  |
| H32 | 0.885 | 0.96  | 0     | 40.708 | 1.882 | 8.686  | 44.248 | 2.264 | 9.154  |
| H33 | 1.77  | 0.969 | 0     | 3.54   | 1.869 | 0.006  | 8.85   | 2.244 | 0.681  |
| H34 | 0     | 0     | 0     | 0      | 0     | 0      | 5.31   | 2.238 | 0.027  |
| H35 | 0     | 0     | 0     | 1.77   | 1.868 | 0      | 4.425  | 2.24  | 0.362  |
| H36 | 3.54  | 0.97  | 0.49  | 20.354 | 1.875 | 2.619  | 24.779 | 2.252 | 2.741  |
| H37 | 0.885 | 0.893 | 0     | 2.655  | 1.868 | 0      | 7.965  | 2.243 | 0.135  |
| H38 | 1.77  | 0.893 | 0.016 | 2.655  | 1.868 | 0      | 8.85   | 2.243 | 0.096  |
| H39 | 0.885 | 0.893 | 0     | 2.655  | 1.868 | 0      | 6.195  | 2.241 | 0.028  |
| H40 | 0     | 0     | 0     | 3.54   | 1.869 | 0.006  | 8.85   | 2.243 | 0.078  |
| H41 | 1.77  | 0.969 | 0.379 | 1.77   | 1.868 | 0      | 7.08   | 2.241 | 0.056  |
| H42 | 0.885 | 0.968 | 0     | 3.54   | 1.869 | 0.006  | 8.85   | 2.243 | 0.085  |
| H43 | 0     | 0     | 0     | 1.77   | 1.868 | 0      | 5.31   | 2.241 | 0.043  |
| H44 | 1.77  | 0.969 | 0.158 | 2.655  | 1.868 | 0      | 8.85   | 2.243 | 0.574  |
| H45 | 0.885 | 0.969 | 0     | 1.77   | 1.866 | 0      | 7.965  | 2.24  | 0.128  |
| H46 | 0     | 0     | 0     | 1.77   | 1.867 | 0      | 5.31   | 2.241 | 0.017  |
| H47 | 1.77  | 0.893 | 0.016 | 3.54   | 1.869 | 0.006  | 8.85   | 2.244 | 1.031  |
| H48 | 0     | 0     | 0     | 2.655  | 1.868 | 0      | 6.195  | 2.243 | 0.41   |
| H49 | 0.885 | 0.893 | 0     | 2.655  | 1.868 | 0      | 7.08   | 2.243 | 0.382  |
| H50 | 1.77  | 0.969 | 0.284 | 2.655  | 1.868 | 0      | 7.08   | 2.243 | 0.061  |
| H51 | 1.77  | 0.959 | 0     | 2.655  | 1.868 | 0      | 6.195  | 2.242 | 0.798  |
| H52 | 0.885 | 0.969 | 0     | 1.77   | 1.867 | 0      | 7.08   | 2.241 | 0.136  |
| H53 | 0     | 0     | 0     | 1.77   | 1.867 | 0      | 5.31   | 2.239 | 0.029  |
| H54 | 1.77  | 0.968 | 0.158 | 2.655  | 1.868 | 0      | 6.195  | 2.241 | 0.048  |
| H55 | 1.77  | 0.959 | 0     | 2.655  | 1.868 | 0      | 7.08   | 2.243 | 0.382  |
| H56 | 0.885 | 0.893 | 0     | 0      | 0     | 0      | 2.655  | 2.217 | 0.041  |
| H57 | 0     | 0     | 0     | 1.77   | 1.867 | 0      | 4.425  | 2.239 | 0.244  |
| H58 | 0     | 0     | 0     | 0      | 0     | 0      | 2.655  | 2.216 | 0.014  |
| H59 | 1.77  | 0.893 | 0.016 | 1.77   | 1.867 | 0      | 7.08   | 2.241 | 0.14   |
| H60 | 3.54  | 0.97  | 0.537 | 2.655  | 1.868 | 0      | 9.735  | 2.244 | 0.409  |
| H61 | 0     | 0     | 0     | 0.885  | 1.865 | 0      | 5.31   | 2.238 | 0.083  |
| H62 | 0     | 0     | 0     | 1.77   | 1.867 | 0      | 5.31   | 2.241 | 0.065  |
| H63 | 0     | 0     | 0     | 0      | 0     | 0      | 2.655  | 2.216 | 0.023  |
| H64 | 0.885 | 0.893 | 0     | 0.885  | 1.865 | 0      | 4.425  | 2.238 | 0.242  |
| H65 | 0     | 0     | 0     | 2.655  | 1.868 | 0      | 4.425  | 2.24  | 0.024  |
| H66 | 1.77  | 0.96  | 0     | 1.77   | 1.867 | 0      | 5.31   | 2.24  | 0.171  |

|     |       |       |       |        |       |       |        |       |       |
|-----|-------|-------|-------|--------|-------|-------|--------|-------|-------|
| H67 | 0     | 0     | 0     | 0      | 0     | 0     | 2.655  | 2.217 | 0.037 |
| H68 | 0     | 0     | 0     | 0.885  | 1.856 | 0     | 5.31   | 2.231 | 0.371 |
| H69 | 0     | 0     | 0     | 0.885  | 1.861 | 0     | 4.425  | 2.235 | 0.144 |
| H70 | 0     | 0     | 0     | 2.655  | 1.868 | 0     | 7.08   | 2.243 | 0.382 |
| H71 | 2.655 | 0.96  | 0.253 | 0      | 0     | 0     | 3.54   | 2.217 | 0.055 |
| Z1  | 0.885 | 0.885 | 0     | 0      | 0     | 0     | 5.31   | 1.38  | 0.082 |
| Z2  | 0     | 0     | 0     | 1.77   | 1.31  | 0     | 6.195  | 1.383 | 0.155 |
| Z3  | 1.77  | 0.893 | 0     | 1.77   | 1.31  | 0     | 7.08   | 1.383 | 0.095 |
| Z4  | 1.77  | 0.901 | 0.032 | 1.77   | 1.31  | 0     | 7.08   | 1.382 | 0.076 |
| Z5  | 1.77  | 0.901 | 0.032 | 0.885  | 1.31  | 0     | 6.195  | 1.382 | 0.08  |
| Z6  | 0     | 0     | 0     | 0.885  | 1.31  | 0     | 4.425  | 1.382 | 0.022 |
| Z7  | 0     | 0     | 0     | 2.655  | 1.31  | 0.003 | 8.85   | 1.383 | 0.161 |
| Z8  | 2.655 | 0.901 | 0.032 | 1.77   | 1.31  | 0     | 7.08   | 1.383 | 0.089 |
| Z9  | 1.77  | 0.909 | 0.047 | 1.77   | 1.31  | 0     | 7.08   | 1.383 | 0.095 |
| Z10 | 0     | 0     | 0     | 33.628 | 1.316 | 8.313 | 33.628 | 1.388 | 5.691 |
| Z11 | 1.77  | 0.901 | 0     | 1.77   | 1.31  | 0     | 7.08   | 1.383 | 0.193 |
| Z12 | 1.77  | 0.893 | 0.016 | 12.389 | 1.312 | 0.598 | 13.274 | 1.384 | 0.499 |
| Z13 | 0.885 | 0.909 | 0     | 1.77   | 1.31  | 0     | 7.965  | 1.383 | 0.079 |
| Z14 | 0     | 0     | 0     | 1.77   | 1.31  | 0     | 7.08   | 1.383 | 0.129 |
| Z15 | 1.77  | 0.893 | 0     | 14.159 | 1.312 | 0.811 | 15.044 | 1.385 | 0.811 |
| Z16 | 1.77  | 0.893 | 0     | 1.77   | 1.31  | 0     | 7.965  | 1.383 | 0.094 |
| Z17 | 1.77  | 0.893 | 0     | 1.77   | 1.31  | 0     | 4.425  | 1.382 | 0.019 |
| Z18 | 0.885 | 0.893 | 0     | 1.77   | 1.31  | 0     | 7.08   | 1.383 | 0.118 |
| Z19 | 0.885 | 0.901 | 0     | 1.77   | 1.31  | 0     | 6.195  | 1.382 | 0.059 |
| Z20 | 0.885 | 0.885 | 0     | 1.77   | 1.31  | 0     | 6.195  | 1.383 | 0.073 |
| Z21 | 0.885 | 0.901 | 0     | 1.77   | 1.31  | 0     | 5.31   | 1.382 | 0.049 |
| Z22 | 0.885 | 0.893 | 0     | 2.655  | 1.31  | 0.005 | 5.31   | 1.382 | 0.031 |
| Z23 | 0     | 0     | 0     | 2.655  | 1.31  | 0.003 | 9.735  | 1.384 | 0.287 |
| Z24 | 0     | 0     | 0     | 1.77   | 1.31  | 0     | 4.425  | 1.382 | 0.027 |
| Z25 | 0.885 | 0.885 | 0     | 2.655  | 1.31  | 0.003 | 7.08   | 1.383 | 0.209 |
| Z26 | 1.77  | 0.893 | 0.016 | 1.77   | 1.31  | 0     | 7.08   | 1.383 | 0.129 |
| Z27 | 1.77  | 0.901 | 0     | 0.885  | 1.31  | 0     | 5.31   | 1.382 | 0.036 |
| Z28 | 0.885 | 0.901 | 0     | 2.655  | 1.31  | 0.003 | 7.965  | 1.383 | 0.138 |
| Z29 | 1.77  | 0.893 | 0.016 | 2.655  | 1.31  | 0.005 | 7.08   | 1.383 | 0.199 |
| Z30 | 0.885 | 0.893 | 0     | 0      | 0     | 0     | 4.425  | 1.38  | 0.078 |
| Z31 | 1.77  | 0.909 | 0     | 1.77   | 1.31  | 0     | 8.85   | 1.383 | 0.31  |
| Z32 | 1.77  | 0.909 | 0     | 2.655  | 1.31  | 0.003 | 6.195  | 1.383 | 0.087 |
| Z33 | 2.655 | 0.909 | 0.063 | 0      | 0     | 0     | 4.425  | 1.38  | 0.044 |
| Z34 | 0     | 0     | 0     | 13.274 | 1.312 | 0.687 | 15.929 | 1.385 | 1.181 |
| Z35 | 0     | 0     | 0     | 0      | 0     | 0     | 1.77   | 1.379 | 0     |
| Z36 | 0     | 0     | 0     | 2.655  | 1.31  | 0.003 | 7.08   | 1.383 | 0.285 |
| Z37 | 1.77  | 0.893 | 0     | 1.77   | 1.31  | 0     | 7.965  | 1.383 | 0.119 |
| Z38 | 1.77  | 0.893 | 0     | 1.77   | 1.31  | 0     | 7.965  | 1.383 | 0.141 |
| Z39 | 0.885 | 0.885 | 0     | 1.77   | 1.31  | 0     | 5.31   | 1.382 | 0.135 |
| Z40 | 0.885 | 0.893 | 0     | 2.655  | 1.31  | 0.003 | 5.31   | 1.383 | 0.054 |
| Z41 | 0.885 | 0.893 | 0     | 1.77   | 1.31  | 0     | 6.195  | 1.383 | 0.173 |
| Z42 | 0.885 | 0.893 | 0     | 1.77   | 1.31  | 0     | 4.425  | 1.382 | 0.034 |
| Z43 | 0     | 0     | 0     | 2.655  | 1.31  | 0.003 | 5.31   | 1.382 | 0.055 |

---
